# Supplementary material
Source: PubMed Central journal article supplement (PMC6402767)
Supplement: NIHMS1518800-supplement-1.pdf [file NIHMS1518800-supplement-1.pdf]

**Appendix**  
**Differences in Prenatal Care by Presence and Type of Maternal Disability**  
**Horner-Johnson et al.**

**Appendix 1.** List of ICD-9 Codes Used to Identify Maternal Disability

| ICD-9 code                                                                  | Condition                                                     |
|-----------------------------------------------------------------------------|---------------------------------------------------------------|
| <b>PHYSICAL DISABILITIES</b>                                                |                                                               |
| <b>Miscellaneous Physical Disabilities</b>                                  |                                                               |
| 138                                                                         | Late effects of polio                                         |
| V46.3                                                                       | Wheelchair dependence                                         |
| V46.8                                                                       | Dependence on other enabling machine                          |
| <b>Nervous System Disabilities</b>                                          |                                                               |
| <i>Hereditary and Degenerative Diseases of Central Nervous System (CNS)</i> |                                                               |
| 237.7                                                                       | Neurofibromatosis (von Recklinghausen's Disease)              |
| 331.89                                                                      | Cerebral ataxia                                               |
| 332.0–332.1                                                                 | Parkinson's Disease                                           |
| 333                                                                         | Other extrapyramidal disease and abnormal movement disorders  |
| 334                                                                         | Spinocerebellar disease                                       |
| 335.1                                                                       | Spinal muscular atrophy                                       |
| 335.2                                                                       | Motor neuron disease                                          |
| 335.8, 335.9                                                                | Other anterior horn cell diseases                             |
| 336                                                                         | Other diseases of the spinal cord                             |
| 337                                                                         | Disorders of the autonomic nervous system                     |
| <i>Other Disorders of the Central Nervous System</i>                        |                                                               |
| 340                                                                         | Multiple Sclerosis                                            |
| 341                                                                         | Other demyelinating diseases of CNS                           |
| 342                                                                         | Hemiplegia and hemiparesis                                    |
| 343                                                                         | Infantile cerebral palsy                                      |
| 344                                                                         | Other paralytic syndromes                                     |
| 345                                                                         | Epilepsy                                                      |
| <i>Peripheral Nervous System Disorders</i>                                  |                                                               |
| 353                                                                         | Nerve root and plexus disorders                               |
| 356                                                                         | Hereditary and idiopathic peripheral neuropathy               |
| 357                                                                         | Inflammatory and toxic neuropathy                             |
| 358                                                                         | Myasthenia gravis                                             |
| 359                                                                         | Muscular dystrophies and other myopathies                     |
| <b>Diseases of the Musculoskeletal System and Connective Tissue</b>         |                                                               |
| 253.0                                                                       | Acromegaly and gigantism                                      |
| 438                                                                         | Late effects of cerebrovascular disease                       |
| 714                                                                         | Rheumatoid arthritis                                          |
| 715                                                                         | Osteoarthritis                                                |
| 717                                                                         | Internal derangement of the knee                              |
| 720                                                                         | Ankylosing spondylitis and other inflammatory spondylopathies |
| 721                                                                         | Spondylosis and allied disorders                              |

**Appendix**  
**Differences in Prenatal Care by Presence and Type of Maternal Disability**  
**Horner-Johnson et al.**

|                             |                                                                  |
|-----------------------------|------------------------------------------------------------------|
| 722                         | Disc disorders                                                   |
| 723                         | Other disorders of the cervical region                           |
| 725                         | Polymyalgia rheumatica                                           |
| 728                         | Disorders of muscle ligament and fascia                          |
| 732                         | Osteochondropathies                                              |
| <b>Injuries</b>             |                                                                  |
| 806                         | Fracture of the vertebral column with spinal cord injury         |
| 905                         | Late effect of musculoskeletal and connective tissue injuries    |
| 907                         | Late effect of injury to the nervous system                      |
| 928                         | Crushing injury of the lower limb                                |
| 952                         | Spinal cord injury                                               |
| 736.89                      | Other acquired limb deformity of unspecified limb                |
| V49.6                       | Amputation of upper limb                                         |
| V49.7                       | Amputation of lower limb                                         |
| <b>Congenital Anomalies</b> |                                                                  |
| 277.0                       | Cystic fibrosis                                                  |
| 253.4                       | Pituitary dwarfism                                               |
| 259.4                       | Dwarfism, not elsewhere classified                               |
| 741                         | Spina Bifida                                                     |
| 742                         | Other congenital anomalies of nervous system                     |
| 754.8                       | Larsen syndrome                                                  |
| 755.2                       | Congenital reduction deformities of upper limb                   |
| 755.3                       | Congenital reduction deformities of lower limb                   |
| 755.1                       | Syndactyly                                                       |
| 755.55                      | Acrocephalosyndactyly (Apert syndrome)                           |
| 754.51–754.7                | Club foot and other congenital valgus deformities of feet        |
| 756                         | Other congenital musculoskeletal anomalies                       |
| <b>HEARING DISABILITIES</b> |                                                                  |
| 389.0                       | Conductive hearing loss                                          |
| 389.1                       | Sensorineural hearing loss                                       |
| 389.2                       | Mixed conductive and sensorineural hearing loss                  |
| 389.7                       | Deaf, nonspeaking, not elsewhere classifiable                    |
| 389.8                       | Other specified forms of hearing loss                            |
| 389.9                       | Unspecified hearing loss                                         |
| 744.0                       | Congenital anomalies of ear causing impairment of hearing        |
| <b>VISION DISABILITIES</b>  |                                                                  |
| 360                         | Disorders of the globe                                           |
| 362                         | Other retinal disorders                                          |
| 363                         | Chorioretinal inflammation, scars and other disorders of choroid |
| 364                         | Disorders of iris and ciliary body                               |

**Appendix**  
**Differences in Prenatal Care by Presence and Type of Maternal Disability**  
**Horner-Johnson et al.**

|                                                          |                                                                                 |
|----------------------------------------------------------|---------------------------------------------------------------------------------|
| 365                                                      | Glaucoma                                                                        |
| 366                                                      | Cataract                                                                        |
| 369                                                      | Blindness and low vision                                                        |
| 377.7                                                    | Disorders of visual cortex                                                      |
| <b>INTELLECTUAL AND DEVELOPMENTAL DISABILITIES (IDD)</b> |                                                                                 |
| 279.11                                                   | DiGeorge syndrome (22q11.2 deletion)                                            |
| 299                                                      | Pervasive developmental disorders                                               |
| 317                                                      | Mild intellectual disabilities                                                  |
| 318                                                      | Other specified intellectual disabilities                                       |
| 319                                                      | Unspecified intellectual disabilities                                           |
| 330                                                      | Cerebral degenerations usually manifest in childhood                            |
| 758.0–758.3                                              | Chromosomal anomalies for which a developmental disability is typically present |
| 758.5                                                    | Other conditions due to autosomal anomalies                                     |
| 758.89                                                   | Other conditions due to chromosomal anomalies                                   |
| 758.9                                                    | Conditions due to anomaly of unspecified chromosome                             |
| 759.5                                                    | Tuberous sclerosis                                                              |
| 759.6                                                    | Other hamartomas                                                                |
| 759.7                                                    | Multiple congenital anomalies not otherwise specified                           |
| 759.8                                                    | Other specified congenital anomalies                                            |
| 760.71                                                   | Alcohol affecting fetus or newborn via placenta or breast milk                  |

## REFERENCES

The code lists above were previously published in:

Darney BG, Biel FM, Quigley BP, Caughey AB, Horner-Johnson W. Primary cesarean delivery patterns among women with physical, sensory, or intellectual disabilities. *Womens Health Issues*. 2017;27(3):336–344. <https://doi.org/10.1016/j.whi.2016.12.007>.

The IDD codes were originally drawn from:

Lin E, Balogh R, Cobigo V, Ouellette-Kuntz H, Wilton AS, Lunskey Y. Using administrative health data to identify individuals with intellectual and developmental disabilities: a comparison of algorithms. *J Intellect Disabil Res*. 2013;57(5):462–477. <https://doi.org/10.1111/jir.12002>.

The physical disability code list was modified from one used by:

Khoury AJ, Hall A, Andresen E, Zhang J, Ward R, Jarjoura C. The association between chronic disease and physical disability among female Medicaid beneficiaries 18–64 years of age. *Disabil Health J*. 2013;6(2):141–148. <https://doi.org/10.1016/j.dhjo.2012.11.006>.

## **APPENDIX 2: SENSITIVITY ANALYSES**

Sensitivity analyses involved conducting our regression analyses with alternate versions of the disability categories. The alternate versions analyzed were: (1) Making disability categories mutually exclusive and adding a separate category of women with multiple types of disabilities; (2) Including cerebral palsy in the intellectual and developmental disability (IDD) category instead of the physical disability category.

As in the main analyses, sensitivity analyses used modified Poisson regression with robust variance estimation and adjusted for maternal race, education, insurance, age, parity, gestational hypertension/preeclampsia, gestational diabetes, mental health diagnosis, and data year. Analyses of number of prenatal care visits were additionally adjusted for gestational age.

### **Sensitivity Analysis 1: Mutually Exclusive Disability Categories**

In the main analyses, disability groups were not mutually exclusive. If women had diagnosis codes associated with more than one type of disability, they were analyzed as part of each applicable group. However, that did not allow provision of information about women with more than one type of disability as a separate group. For this set of sensitivity analyses, mutually exclusive physical, hearing, vision, and IDD categories were constructed, as well as an additional category of women with multiple disability types. The counts in each disability group were as follows:

| <b>Disability type</b> | <b>N</b> |
|------------------------|----------|
| Physical               | 27,643   |
| Hearing                | 2,670    |
| Vision                 | 1,242    |
| IDD                    | 1,534    |
| Multiple               | 294      |

Results of regression analyses with these disability categories are shown below, side-by-side with results from the original disability categories for comparison purposes.

Late Prenatal Care Initiation (second/third trimester versus first)

| <b>Disability type</b> | <b>Original disability categories:<br/>Adjusted RR (95% CI)</b> | <b>Mutually exclusive categories:<br/>Adjusted RR (95% CI)</b> |
|------------------------|-----------------------------------------------------------------|----------------------------------------------------------------|
| Physical               | 0.91 (0.88, 0.94)                                               | 0.91 (0.88, 0.94)                                              |
| Hearing                | 1.11 (1.02, 1.21)                                               | 1.11 (1.02, 1.22)                                              |
| Vision                 | 0.85 (0.73, 0.99)                                               | 0.85 (0.72, 0.99)                                              |
| IDD                    | 1.21 (1.09, 1.33)                                               | 1.20 (1.08, 1.34)                                              |
| Multiple               | –                                                               | 1.15 (0.89, 1.47)                                              |

**Appendix**  
**Differences in Prenatal Care by Presence and Type of Maternal Disability**  
**Horner-Johnson et al.**

**Fewer Prenatal Visits Than Recommended (0–10 versus 11–14)**

| <b>Disability type</b> | <b>Original disability categories: Mutually exclusive categories:</b> |                             |
|------------------------|-----------------------------------------------------------------------|-----------------------------|
|                        | <b>Adjusted RR (95% CI)</b>                                           | <b>Adjusted RR (95% CI)</b> |
| Physical               | 1.00 (0.99, 1.02)                                                     | 1.00 (0.98, 1.02)           |
| Hearing                | 1.12 (1.07, 1.17)                                                     | 1.11 (1.05, 1.16)           |
| Vision                 | 1.08 (1.01, 1.16)                                                     | 1.08 (1.01, 1.16)           |
| IDD                    | 1.08 (1.01, 1.15)                                                     | 1.05 (0.99, 1.13)           |
| Multiple               | –                                                                     | 1.30 (1.14, 1.48)           |

**More Prenatal Visits Than Typical ( $\geq 15$  versus 11–14)**

| <b>Disability type</b> | <b>Original disability categories: Mutually exclusive categories:</b> |                             |
|------------------------|-----------------------------------------------------------------------|-----------------------------|
|                        | <b>Adjusted RR (95% CI)</b>                                           | <b>Adjusted RR (95% CI)</b> |
| Physical               | 1.14 (1.12, 1.16)                                                     | 1.14 (1.12, 1.16)           |
| Hearing                | 0.98 (0.91, 1.05)                                                     | 0.97 (0.90, 1.05)           |
| Vision                 | 1.01 (0.92, 1.12)                                                     | 1.01 (0.92, 1.12)           |
| IDD                    | 1.23 (1.14, 1.32)                                                     | 1.19 (1.10, 1.29)           |
| Multiple               | –                                                                     | 1.24 (1.02, 1.50)           |

In the above analyses, women with multiple disabilities were significantly over-represented at both ends of the distribution of number of prenatal care visits, relative to women without disabilities. Proportionally, women with IDD were the most likely to have multiple types of disabilities recorded. When these women were moved out of the IDD category and into the separate multiple disability category, the effects previously seen for the IDD group were slightly attenuated. In the case of receiving too few prenatal visits (0–10 instead of 11–14), the effect was no longer statistically significant for women with IDD when women with multiple disabilities were separated out. These findings suggest that women with IDD who also have other types of disabilities are a particularly at-risk group.

**Sensitivity Analysis 2: Grouping Cerebral Palsy With IDD**

In the main analyses, cerebral palsy (CP) was grouped with physical disability rather than with IDD, because CP always affects physical functioning to some degree but only sometimes affects cognitive functioning. This definition of IDD was consistent with that used in several other studies of pregnancy outcomes (see references 2, 13, 14, and 24 in the body of the paper). However, another set of pregnancy outcome studies has included CP in the IDD category (references 1, 7, and 10 in the paper). For comparison purposes, this set of sensitivity analyses grouped CP with IDD instead of with physical disability. This resulted in 678 cases being moved into the IDD category. Regression results for physical disability and IDD groups are shown below, with results of the main analyses and the sensitivity analyses shown side-by-side.

Late Prenatal Care Initiation (second/third trimester versus first)

| Disability type | Original disability categories: | CP grouped with IDD: |
|-----------------|---------------------------------|----------------------|
|                 | Adjusted RR (95% CI)            | Adjusted RR (95% CI) |
| Physical        | 0.91 (0.88, 0.94)               | 0.91 (0.88, 0.94)    |
| IDD             | 1.21 (1.09, 1.33)               | 1.09 (1.00, 1.19)    |

Fewer Prenatal Visits Than Recommended (0–10 versus 11–14)

| Disability type | Original disability categories: | CP grouped with IDD: |
|-----------------|---------------------------------|----------------------|
|                 | Adjusted RR (95% CI)            | Adjusted RR (95% CI) |
| Physical        | 1.00 (0.99, 1.02)               | 1.00 (0.99, 1.02)    |
| IDD             | 1.08 (1.01, 1.15)               | 1.05 (1.00, 1.11)    |

More Prenatal Visits Than Typical ( $\geq 15$  versus 11–14)

| Disability type | Original disability categories: | CP grouped with IDD: |
|-----------------|---------------------------------|----------------------|
|                 | Adjusted RR (95% CI)            | Adjusted RR (95% CI) |
| Physical        | 1.14 (1.12, 1.16)               | 1.15 (1.12, 1.17)    |
| IDD             | 1.23 (1.14, 1.32)               | 1.17 (1.10, 1.25)    |

Effects seen for the IDD group in the main analysis were attenuated when CP was added to the IDD group. This suggests that women with non-CP IDD diagnoses experience greater disparities in initiation of prenatal care and number of visits than is the case for women with CP.
